# Supplementary material for: High-Sensitivity Cardiac Troponin T in Patients with Severe Chronic Kidney Disease and Suspected Acute Coronary Syndrome
Source: MDPI journal article supplement (doi:10.3390/jcm10184216), 2021-09-17
Supplement: s1 [file s1]

# High-Sensitivity Cardiac Troponin T in Patients with Severe Chronic Kidney Disease and Suspected Acute Coronary Syndrome

## SUPPLEMENTARY CONTENT

|                                                                                                                                       |    |
|---------------------------------------------------------------------------------------------------------------------------------------|----|
| Table S1. Baseline characteristics of patients with severe CKD.....                                                                   | 2  |
| Table S2. Values of hs-cTnT during serial sampling in patients with normal renal function versus those with severe CKD.....           | 4  |
| Table S3. Values of hs-cTnT during serial sampling in patients with severe CKD according to the indication for revascularization..... | 5  |
| Table S4. Diagnostic performance of hs-cTnT at serial sampling in patients with severe CKD.....                                       | 6  |
| Table S5. Diagnostic performance at presentation and absolute changes of hs-cTnT in patients with severe CKD.....                     | 7  |
| Table S6. Outcomes at 30 days and one year of follow-up in patients with severe CKD.....                                              | 8  |
| Figure S1. Flow chart of the selection process of patients with severe CKD included in the ROC-analysis.....                          | 9  |
| Figure S2. Correlation between hs-cTnT and creatinine levels.....                                                                     | 10 |
| Figure S3. Kaplan Meier estimates of adverse events at one year.....                                                                  | 11 |
| Figure S4. Independent predictors of adverse events at one year.....                                                                  | 12 |

**Table S1. Baseline characteristics of patients with severe CKD.**

|                      | Revascularization |                |                 | P-value |
|----------------------|-------------------|----------------|-----------------|---------|
|                      | Total<br>290      | No<br>68 (24)  | Yes<br>222 (76) |         |
| Age                  | 73 (64, 79)       | 74 (63, 80)    | 73 (64, 78)     | 0.780   |
| Male                 | 204 (70)          | 39 (57)        | 165 (74)        | 0.010   |
| <b>Risk factors</b>  |                   |                |                 |         |
| BMI                  | 26 (23, 31)       | 26 (23, 30)    | 26 (23, 31)     | 0.607   |
| Hypertension         | 268 (92)          | 63 (93)        | 205 (92)        | 1.000   |
| Hypercholesterolemia | 213 (73)          | 49 (72)        | 164 (74)        | 0.756   |
| Diabetes mellitus    | 162 (56)          | 31 (46)        | 131 (59)        | 0.069   |
| Current smoking      | 69 (32)           | 13 (28)        | 56 (33)         | 0.597   |
| COPD                 | 55 (19)           | 14 (21)        | 41 (18)         | 0.725   |
| Family history       | 33 (39)           | 4 (25)         | 29 (42)         | 0.263   |
| <b>History</b>       |                   |                |                 |         |
| CAD                  | 205 (71)          | 39 (57)        | 166 (75)        | 0.006   |
| 1-vessel CAD         | 22 (8)            | 6 (9)          | 16 (7)          | 0.795   |
| 2-vessel CAD         | 32 (11)           | 6 (9)          | 26 (12)         | 0.517   |
| 3-vessel CAD         | 142 (51)          | 27 (40)        | 115 (54)        | 0.051   |
| Previous MI          | 157 (54)          | 30 (44)        | 127 (57)        | 0.071   |
| Previous PCI         | 162 (56)          | 30 (44)        | 132 (59)        | 0.036   |
| Previous CABG        | 95 (33)           | 17 (25)        | 78 (35)         | 0.140   |
| Previous stroke      | 43 (15)           | 8 (12)         | 35 (16)         | 0.559   |
| PAD                  | 110 (38)          | 20 (29)        | 90 (41)         | 0.116   |
| <b>Vital signs</b>   |                   |                |                 |         |
| Systolic BP          | 139 (120, 156)    | 138 (117, 156) | 140 (120, 157)  | 0.614   |
| Diastolic BP         | 71 (62, 83)       | 76 (66, 85)    | 70 (61, 82)     | 0.128   |
| Heart rate           | 80 (71, 94)       | 80 (69, 90)    | 80 (72, 95)     | 0.416   |
| SaO <sub>2</sub>     | 97 (95, 99)       | 97 (95, 100)   | 97 (95, 99)     | 0.430   |
| Angina CCS Class     | 4 (3, 4)          | 3 (3, 4)       | 4 (3, 4)        | 0.06    |
| EGC changes          | 179 (64)          | 34 (52)        | 145 (68)        | 0.018   |

|                                 |                |                |                |        |
|---------------------------------|----------------|----------------|----------------|--------|
| ST-segment depression           | 82 (29)        | 10 (15)        | 72 (34)        | 0.003  |
| T-wave inversion                | 84 (30)        | 17 (26)        | 67 (32)        | 0.443  |
| LBBB                            | 34 (12)        | 8 (12)         | 26 (12)        | 1.000  |
| Ns ST-segment elevations        | 18 (6)         | 3 (5)          | 15 (7)         | 0.578  |
| LVEF                            | 47 (35, 55)    | 54 (34, 60)    | 45 (35, 55)    | 0.076  |
| GRACE risk score                | 135 (118, 154) | 131 (111, 150) | 136 (119, 155) | 0.167  |
| <b>Renal function</b>           |                |                |                |        |
| Creatinine, mg/dl               | 3.2 (2.4, 5.7) | 3.0 (2.2, 5.0) | 3.3 (2.4, 5.7) | 0.176  |
| eGFR, mL/min/1.73m <sup>2</sup> | 23 (18, 27)    | 24 (18, 28)    | 23 (18, 27)    | 0.499  |
| <b>Stages of CKD</b>            |                |                |                |        |
| eGFR 15-29                      | 137 (47)       | 36 (53)        | 101 (45)       | 0.331  |
| eGFR <15                        | 19 (7)         | 5 (7)          | 14 (6)         | 0.781  |
| CKD G5D                         | 134 (46)       | 27 (40)        | 107 (48)       | 0.266  |
| <b>Intervention</b>             |                |                |                |        |
| PCI                             | 197 (68)       | 0 (0)          | 197 (89)       | <0.001 |
| CABG                            | 25 (9)         | 0 (0)          | 25 (11)        | <0.001 |

Depicted are medians with interquartile ranges (IQR) or counts with frequencies (%). P-values are from Wilcoxon rank sum or Fisher's Chi2 tests. Severe CKD defined as eGFR <30 mL/min/1.73m<sup>2</sup>. BMI: body mass index in kg/m<sup>2</sup>; BP: blood pressure; CABG: coronary artery bypass grafting; CAD: coronary artery disease; CCS: Canadian cardiovascular society; CKD: chronic kidney disease; COPD: chronic obstructive pulmonary disease; CKD G5D: chronic kidney disease G5 treated by dialysis; eGFR: estimated glomerular filtration rate according to the CKD-EPI creatinine equation; GRACE: the Global Registry of Acute Coronary Events; LBBB: left bundle-branch block, LVEF: left ventricular ejection fraction; MI: myocardial infarction; ns: non significant; PAD: peripheral artery disease; PCI: percutaneous coronary intervention; SaO<sub>2</sub>: arterial oxygen saturation.

**Table S2. Values of hs-cTnT during serial sampling in patients with normal renal function versus those with severe CKD.**

| <b>Hs-cTnT (ng/L)</b> | <b>Normal renal function</b><br>n=300 | <b>Severe CKD</b><br>n=290 | <b>P-value</b> |
|-----------------------|---------------------------------------|----------------------------|----------------|
| <b>Presentation</b>   | 25 (7-102)                            | 114 (52-314)               | <0.01          |
| <b>3 hours</b>        | 29 (7-116)                            | 160 (74-369)               | <0.01          |
| <b>Peak</b>           | 58 (11-210)                           | 207 (79-537)               | <0.01          |

Depicted are medians with interquartile ranges. P-values are from Wilcoxon rank sum test. Severe CKD defined as eGFR <30 mL/min/1.73m<sup>2</sup>. CKD: chronic kidney disease; eGFR: estimated glomerular filtration rate according to the CKD-EPI creatinine equation; hs-cTnT: high sensitivity cardiac troponin T.

**Table S3. Values of hs-cTnT during serial sampling in patients with severe CKD according to the indication for revascularization.**

| Hs-cTnT (ng/L)      | Revascularization |               | P-value |
|---------------------|-------------------|---------------|---------|
|                     | No<br>n=68        | Yes<br>n=222  |         |
| <b>Presentation</b> | 46 (28-81)        | 160 (69-485)  | <0.001  |
| <b>3 hours</b>      | 55 (29-88)        | 194 (105-409) | <0.001  |
| <b>6 hours</b>      | 47 (31-96)        | 212 (99-572)  | <0.001  |
| <b>Peak</b>         | 56 (32-93)        | 282 (132-746) | <0.001  |

Depicted are medians with interquartile ranges. P-values are from Wilcoxon rank sum test. Severe CKD defined as eGFR <30 mL/min/1.73m<sup>2</sup>. CKD: chronic kidney disease; eGFR: estimated glomerular filtration rate according to the CKD-EPI creatinine equation; hs-cTnT: high sensitivity cardiac troponin T.

**Table S4. Diagnostic performance of hs-cTnT at serial sampling in patients with severe CKD.**

|                                             | <b>Hs-cTnT-0h</b> | <b>Hs-cTnT-3h</b> | <b>Hs-cTnT-peak</b> |
|---------------------------------------------|-------------------|-------------------|---------------------|
| <b>AUC (95% CI)</b>                         | 0.81 (0.75-0.87)  | 0.84 (0.75-0.93)  | 0.86 (0.81-0.92)    |
| <b>ROC optimized cutoff</b>                 | ≥ 55 ng/L         | ≥ 84 ng/L         | ≥ 95ng/L            |
| Sensitivity (95% CI)                        | 83 (77-88)        | 85 (76-91)        | 84 (79-90)          |
| Specificity (95% CI)                        | 65 (52-77)        | 70 (46-87)        | 78 (66-89)          |
| <b>99<sup>th</sup> percentile</b>           | ≥ 14 ng/L         | ≥ 14 ng/L         | ≥ 14 ng/L           |
| Sensitivity (95% CI)                        | 98 (95-99)        | 99 (94-100)       | 98 (95-100)         |
| Specificity (95% CI)                        | 10 (2-19)         | 15 (4-39)         | 4 (1-15)            |
| <b>Specificity optimized cutoff (≥ 80%)</b> | ≥ 95 ng/L         | ≥ 96 ng/L         | ≥ 112 ng/L          |
| Sensitivity (95% CI)                        | 70 (63-77)        | 77 (68-85)        | 79 (73-85)          |
| Specificity (95% CI)                        | 80 (68-91)        | 85 (61-96)        | 82 (71-92)          |
| <b>Sensitivity optimized cutoff (≥ 90%)</b> | ≥ 37 ng/L         | ≥ 56 ng/L         | ≥ 71 ng/L           |
| Sensitivity (95% CI)                        | 90 (85-94)        | 91 (84-96)        | 90 (86-95)          |
| Specificity (95% CI)                        | 49 (35-63)        | 55 (32-76)        | 60 (45-73)          |

Depicted are AUCs and different cutoff levels with sensitivities and specificities in percent and 95% confidence intervals (CI) of hs-cTnT at presentation, 3 hours and peak prior to angiography. Severe CKD defined as eGFR <30 mL/min/1.73m<sup>2</sup>. AUC: area under the receiver operating characteristic curve; CKD: chronic kidney disease; eGFR: estimated glomerular filtration rate according to the CKD-EPI creatinine equation; ROC: receiver operating characteristic curve.

**Table S5. Diagnostic performance at presentation and absolute changes of hs-cTnT in patients with severe CKD.**

|                             | <b>Hs-cTnT-0h</b> | <b>  <math>\Delta</math>0h-3h  </b> | <b>  <math>\Delta</math>0h-6h  </b> | <b>0h +   <math>\Delta</math>3-0h  </b>                  |
|-----------------------------|-------------------|-------------------------------------|-------------------------------------|----------------------------------------------------------|
| <b>Median (IQR)</b>         | 130 (48, 411)     | 27 (4, 108)                         | 65 (7, 301)                         | -                                                        |
| <b>AUC (95% CI)</b>         | 0.81 (0.75-0.87)  | 0.79 (0.64-0.95)                    | 0.84 (0.72-0.96)                    | 0.84 (0.75-0.89)                                         |
| <b>ROC optimized cutoff</b> | $\geq 55$ ng/L    | $\geq 4$ ng/L                       | $\geq 8$ ng/L                       | 0h $\geq 55$ ng/L or<br>  $\Delta$ 0h-3h   $\geq 4$ ng/L |
| Sensitivity (95% CI)        | 83 (77-88)        | 91 (81-96)                          | 84 (70-92)                          | 98 (91-100)                                              |
| Specificity (95% CI)        | 65 (52-77)        | 64 (32-88)                          | 70 (35-92)                          | 55 (25-82)                                               |
| <b>PPV (95% CI)</b>         | 89 (85-94)        | 94 (84-98)                          | 93 (80-98)                          | 93 (83-97)                                               |
| <b>NPV (95% CI)</b>         | 52 (39-64)        | 54 (26-80)                          | 47 (22-73)                          | 86 (42-99)                                               |

Depicted are medians in ng/L with interquartile ranges (IQR) and AUCs with 95% confidence intervals (95% CI) of hs-cTnT at presentation, absolute changes at 3 and 6 hours and the combination of hs-cTnT at presentation with absolute 3-hour changes. Severe CKD defined as eGFR  $<30$  mL/min/1.73m<sup>2</sup>. AUC: area under the curve; CKD: chronic kidney disease; eGFR: estimated glomerular filtration rate according to the CKD-EPI creatinine equation; NPV: negative predictive value; PPV: positive predictive value.

**Table S6. Outcomes at 30 days and one year of follow-up in patients with severe CKD.**

|                             | Revascularization |        |         |         |
|-----------------------------|-------------------|--------|---------|---------|
|                             | Total             | No     | Yes     | P-value |
| <b>30 days</b>              |                   |        |         |         |
| All cause death             | 14 (7)            | 1 (2)  | 13 (8)  | 0.199   |
| MACE                        | 17 (8)            | 0 (0)  | 17 (11) | 0.015   |
| Cardiovascular death        | 9 (4)             | 0 (0)  | 9 (6)   | 0.214   |
| Myocardial infarction       | 9 (5)             | 0 (0)  | 9 (6)   | 0.120   |
| Unplanned revascularization | 6 (3)             | 0 (0)  | 6 (4)   | 0.339   |
| <b>365 days</b>             |                   |        |         |         |
| All cause death             | 51 (29)           | 5 (13) | 46 (34) | 0.010   |
| MACE                        | 71 (42)           | 4 (11) | 67 (50) | <0.001  |
| Cardiovascular death        | 29 (19)           | 3 (8)  | 26 (23) | 0.056   |
| Myocardial infarction       | 49 (33)           | 1 (3)  | 48 (41) | <0.001  |
| Unplanned revascularization | 33 (24)           | 2 (6)  | 31 (31) | 0.002   |

Depicted are counts with frequencies (%). P-values are from log-rank tests. Severe CKD defined as eGFR <30 mL/min/1.73m<sup>2</sup>. CKD: chronic kidney disease; eGFR: estimated glomerular filtration rate according to the CKD-EPI creatinine equation; MACE: major adverse cardiovascular events (cardiovascular death, myocardial infarction, unplanned revascularization).



**Figure S1. Flow chart of the selection process of patients with severe CKD included in the ROC-analysis.**

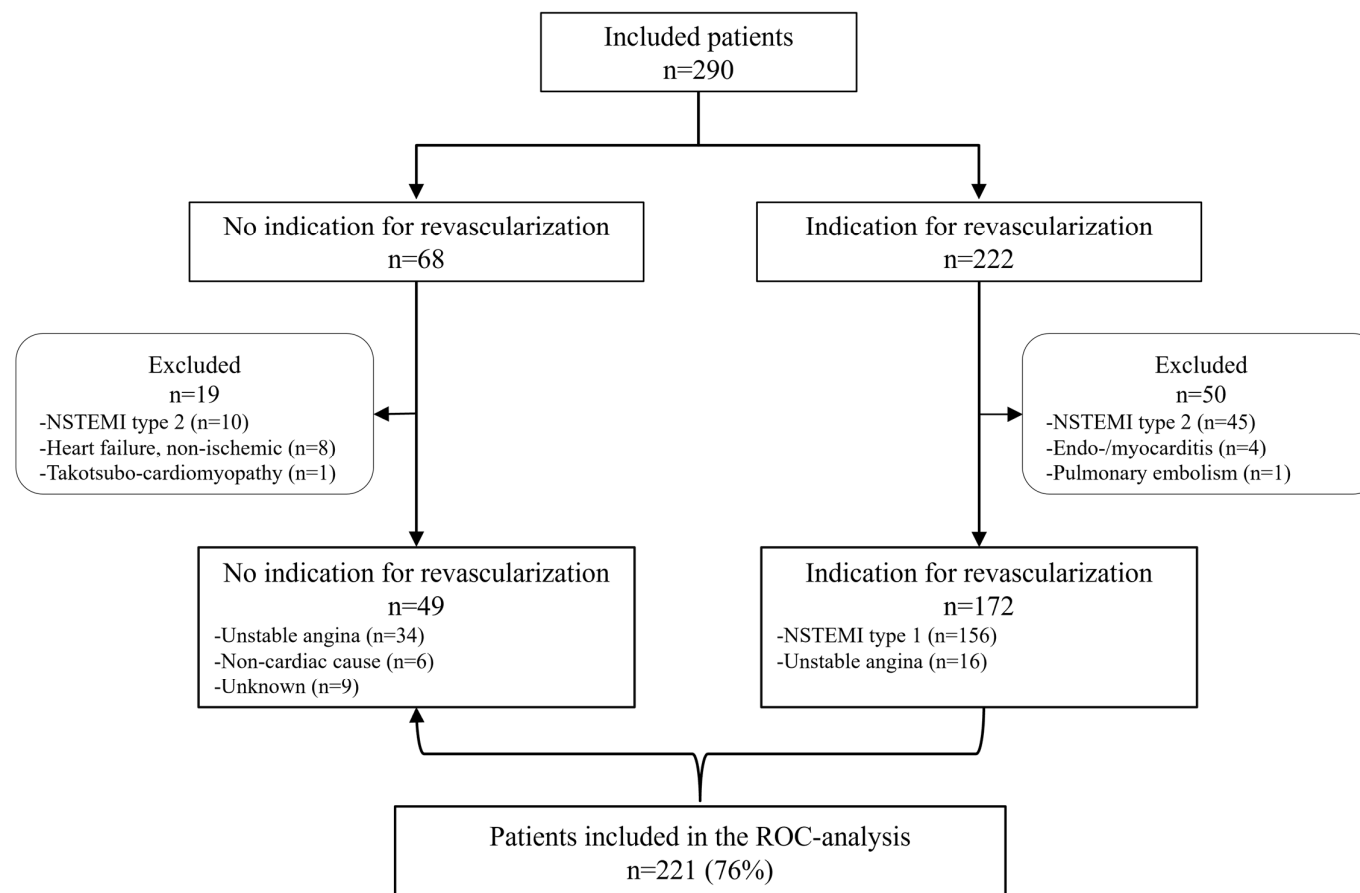

Severe CKD defined as eGFR <30 mL/min/1.73m<sup>2</sup>. CKD: chronic kidney disease; eGFR: estimated glomerular filtration rate according to the CKD-EPI creatinine equation; NSTEMI: non-ST-elevation acute myocardial infarction; ROC: receiver operating characteristic curve.

Figure S2. Correlation between hs-cTnT and creatinine levels.

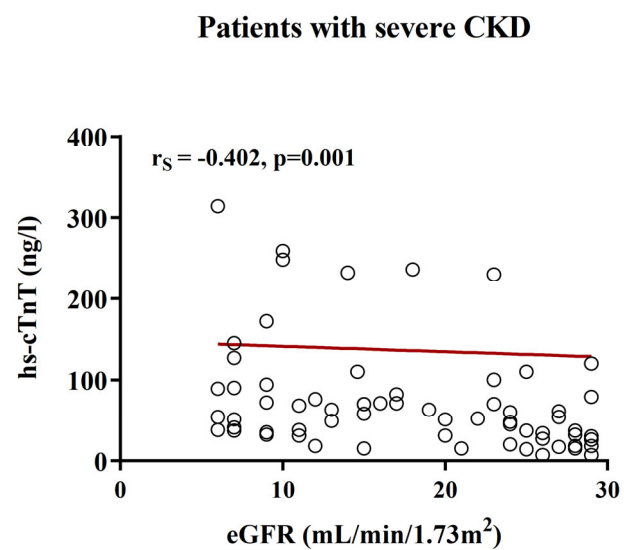

Depicted is the correlation between levels of hs-cTnT and creatinine in the non-revascularization subgroup of the cohort with severe CKD. Severe CKD defined as eGFR <30 mL/min/1.73m<sup>2</sup>. RS is the Spearman correlation coefficient. CKD: chronic kidney disease; eGFR: estimated glomerular filtration rate according to the CKD-EPI creatinine equation.

Figure S3. Kaplan Meier estimates of adverse events at one year.

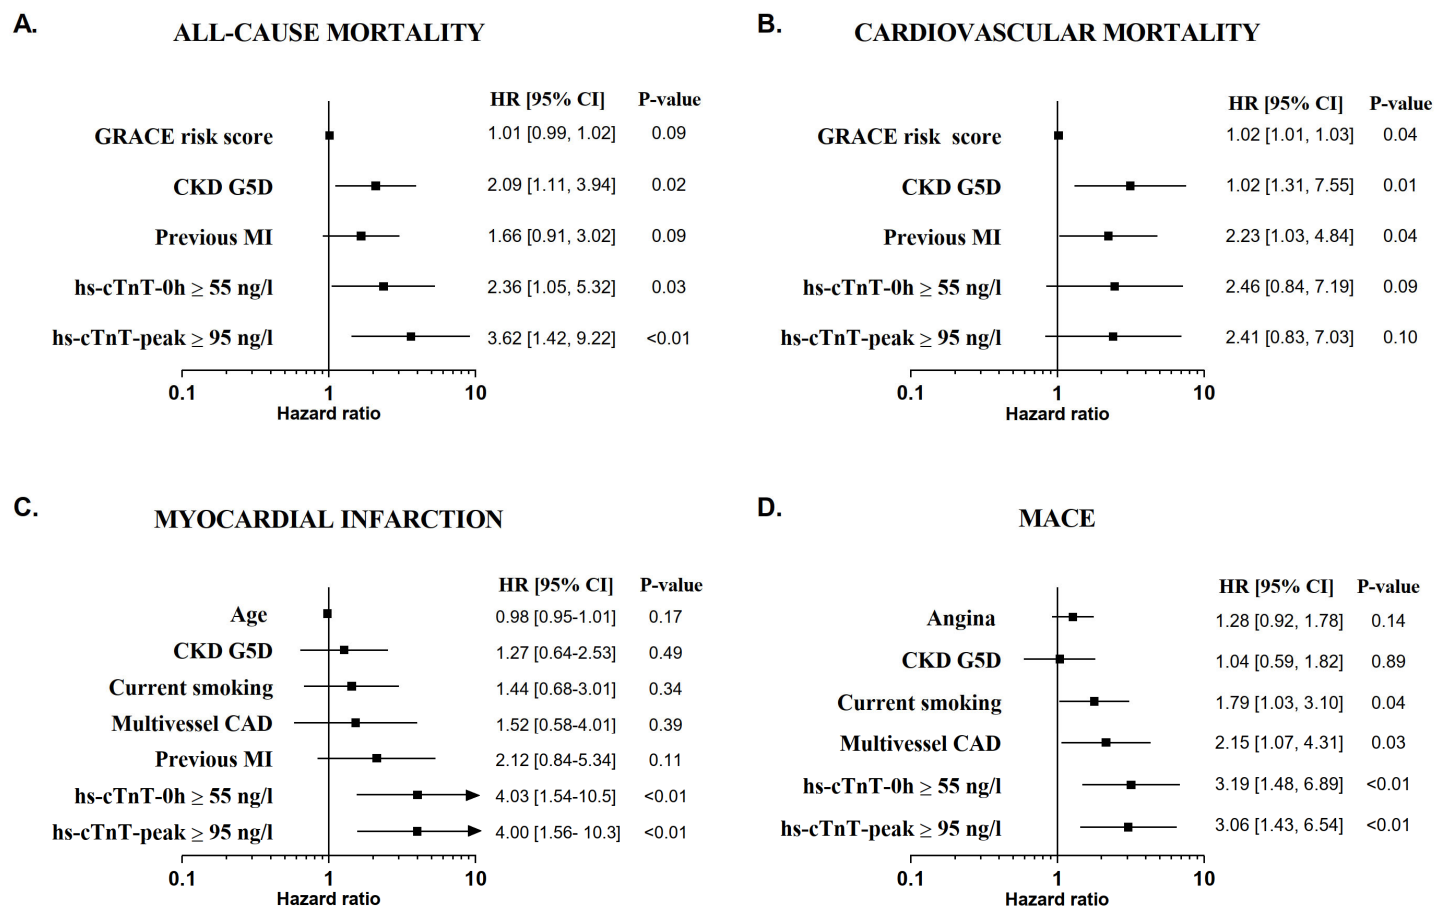

Depicted are the Kaplan Meier estimates of adverse events in patients with severe CKD (eGFR <30 mL/min/1.73m<sup>2</sup>) at one year, according to ROC optimized hs-cTnT cutoffs at presentation and peak of all-cause mortality (A and C) and MACE (B and D). Cumulative incidence (%) of events is from Kaplan Meier, crude hazard ratios (HR) and 95% CIs are from Cox regressions. CKD: chronic kidney disease; eGFR: estimated glomerular filtration rate according to the CKD-EPI creatinine equation; hs-cTnT: high sensitivity cardiac troponin T; MACE: composite of cardiovascular death, myocardial infarction or unplanned revascularization for ischemia; ROC: receiver-operating characteristic curve.

**Figure S4. Independent predictors of adverse events at one year**

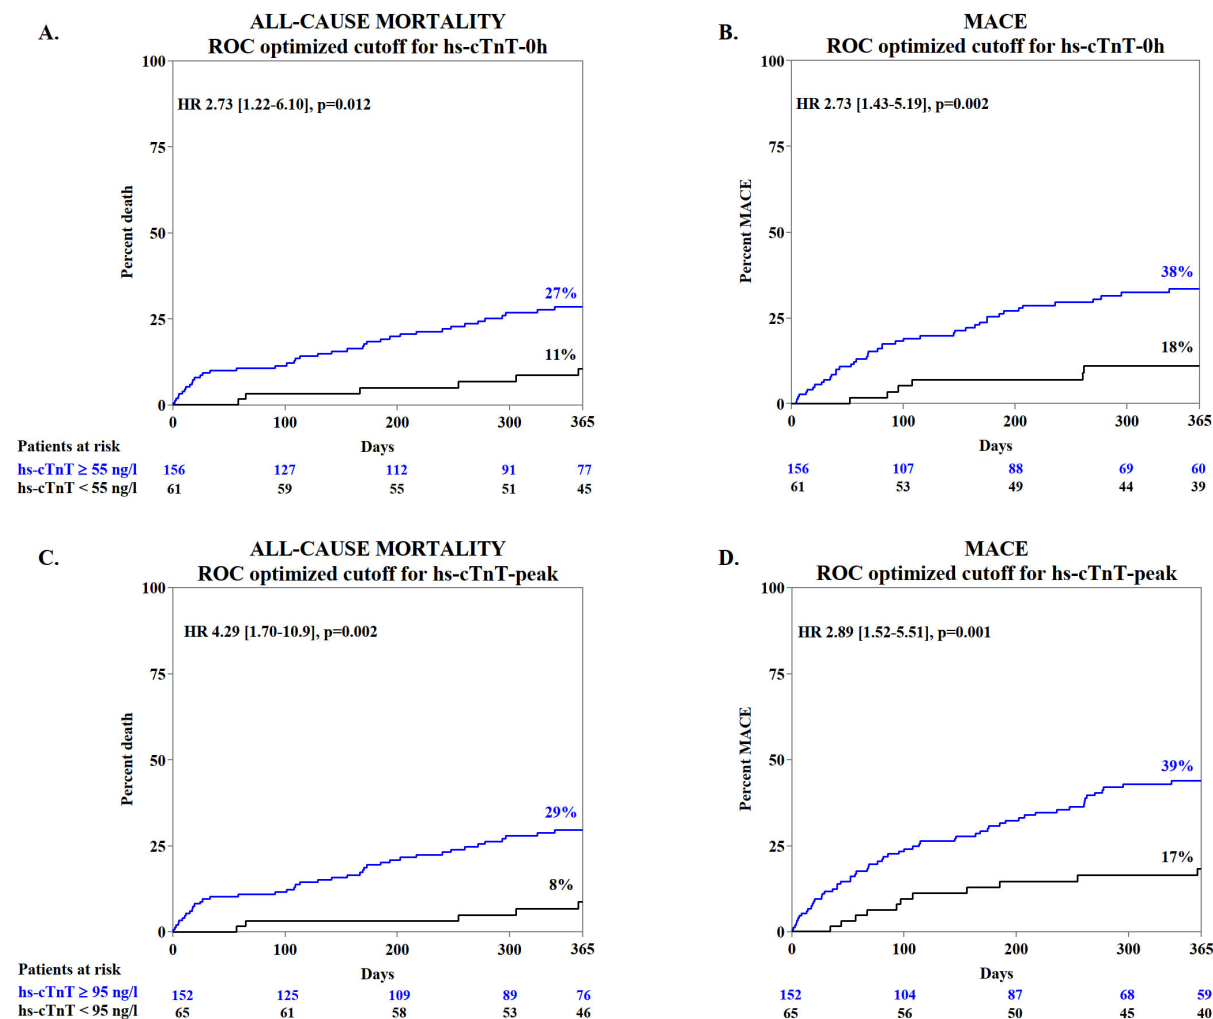

Depicted are the independent predictors of adverse events in patients with severe CKD (eGFR <30 mL/min/1.73m<sup>2</sup>) at one year: A) all-cause mortality, B) cardiovascular mortality, C) myocardial infarction and D) MACE. The symbols indicate the point estimate (hazard ratios [HR]) and the lines the 95% Confidence Intervals [95% CI] from multivariate logistic regression. The arrow indicates a CI-value beyond the shown axis limit. CAD: coronary artery disease; CKD: chronic kidney disease; eGFR: estimated glomerular filtration rate according to the CKD-EPI creatinine equation; CKD G5D: chronic kidney disease G5 treated by dialysis; GRACE: Global Registry of Acute Coronary Events; MI: myocardial infarction; MACE: composite of cardiovascular death, MI or unplanned revascularization for ischemia; ROC: receiver-operating characteristic curve.
